# Supplementary material for: The Pathogen- and Incidence-Based DALY Approach: An Appropriated Methodology for Estimating the Burden of Infectious Diseases
Source: PLOS journal article supplement (doi:10.1371/journal.pone.0079740), 2013-11-20
Supplement: S1 (10.1371/journal.pone.0079740.s001) [file journal.pone.0079740.s001]

1 **Supporting Information file 1. – Modelling the disease burden in DALYs using an incidence-**  
2 **and pathogen-based approach.**

3

4 Having defined an outcome tree for a particular infectious pathogen (see figure S1), crude annual  
5 numbers of incident symptomatic cases ( $n_c$ ) for the root health outcome  $l_r$ , stratified by sex  $s$  ( $s=0,1$ )  
6 and age at infection  $a$  ( $a=0$ - $a_{\max}$ ), is extracted from surveillance data, and used as initial model input.

7 Where necessary  $n_c$  has to be corrected for underestimation by a factor  $\sigma$ , estimated either directly, or  
8 as the product of a factor  $\alpha$  (to correct for under-ascertainment) and a factor  $\beta$  (to correct for under-  
9 reporting). All three factors may be age-dependent and/or sex-dependent, and are pathogen- and

10 country-specific. The number of incident symptomatic cases ( $n_e$ ) for root health outcome  $l_r$  can then be  
11 estimated as:

$$12 \quad n_e^{a,s} = n_c^{a,s} * \sigma^{a,s} = n_c^{a,s} * (\alpha^{a,s} * \beta^{a,s}).$$

13 Here  $n_e$  represents the number of symptomatically infected cases, but not all infected cases, as some  
14 infections may be asymptomatic. Therefore, if asymptomatic cases contribute to disease burden,  $n_e$   
15 has to be corrected by a factor  $\tau$  to estimate the number of all infected cases ( $n_t$ ).  $\tau$  may be age- and/or  
16 sex-dependent. Then the estimated number of all infected cases is:

$$17 \quad n_t^{a,s} = n_e^{a,s} * \tau^{a,s} = (n_c^{a,s} * \sigma^{a,s}) * \tau^{a,s} = (n_c^{a,s} * (\alpha^{a,s} * \beta^{a,s})) * \tau^{a,s}.$$

18 The number of asymptotically infected incident cases ( $n_f$ ) is then:

$$19 \quad n_f^{a,s} = n_t^{a,s} - n_e^{a,s}.$$

20 We estimate the numbers of incident cases of sequelae and deaths using conditional probabilities of  
21 moving from one health outcome ( $l$ ) to another, taking into account the sequence of events as

22 illustrated in the outcome tree shown in figure S1. These conditional probabilities may be age- and/or

23 sex-dependent, which implies that the age  $\tilde{a}$  at disease onset of health outcome  $l$  depends on the age at  
 24 infection  $a$ . The age at disease onset in turn determines disease severity and lethality and potential  
 25 future health outcomes.

26 Let  $l_r$  be the root health outcome of *symptomatic* infections and  $\mu(D_r | l_r)$  be the conditional  
 27 probability of dying from health outcome  $l_r$ . Furthermore, let  $l_r$  be the root health outcome with for  
 28 example maximum two<sup>1</sup> sequences of events (i.e. sequelae) occurring. Then  $p(l_{c_i} | l_r)$  is the  
 29 conditional probability of moving from the root health outcome  $l_r$  to the outcome  $l_{c_i}$ . There are  $k$   
 30 possible health outcomes  $l_{c_i}$  ( $i=1, \dots, k$ ). Assume further that some of the health outcomes  $l_{c_i}$  can be  
 31 followed by a health outcome  $l_{g_{j(i)}}$  with  $m_i$  possible outcomes ( $j=1, \dots, m_i$ ). Then  $p(l_{g_{j(i)}} | l_{c_i})$  is the  
 32 conditional probability of moving from health outcome  $c_i$  to health outcome  $g_{j(i)}$ . And  $\mu(D_{c_i} | l_{c_i})$  is the  
 33 conditional probability of dying from health outcome  $l_{c_i}$ . Assume further that  $\mu(D_{g_{j(i)}} | l_{g_{j(i)}})$  is the  
 34 conditional probability of dying from health outcome  $l_{g_{j(i)}}$ . Note that in most cases, many of these  
 35 conditional probabilities will be 0.

36 For some infectious diseases also asymptotically infected persons may develop sequelae  
 37 that contribute to disease burden. While these sequelae are the same as for symptomatic infections, the  
 38 conditional probability of moving from an *asymptomatic* infection ( $l_y$ ) to health outcome  $l_{c_i}$  may be  
 39 different, why denoted as  $p(l_{c_i} | l_y)$ .

40 If becoming infected at age  $a$  and being of sex  $s$ , than the number of non-fatal incident cases  
 41 for health outcome  $l_{c_i}$  is:

$$42 \quad n_{l_{c_i}}^{a,s} = n_e^{a,s} * p(l_{c_i} | l_r)^{\tilde{a},s} + n_f^{a,s} * p(l_{c_i} | l_y)^{\tilde{a},s} ;$$

---

<sup>1</sup> Two sequences of events are used for illustration, but  $x$  sequences of events can follow on symptomatic infections.

43 and the number of non-fatal incident cases for health outcome  $l_{g_{j(i)}}$  is:

$$44 \quad n_{l_{g_{j(i)}}}^{a,s} = n_{l_{c_i}}^{a,s} * p(l_{g_{j(i)}} | l_{c_i})^{\tilde{a},s}$$

45 Whereas the number of fatal incident cases for health outcome  $l_r$  is:

$$46 \quad d_{l_r}^{a,s} = n_e^{a,s} * p(D_r | l_r)^{\tilde{a},s};$$

47 than the number of fatal incident cases for health outcome  $l_{c_i}$  is:

$$48 \quad d_{l_{c_i}}^{a,s} = n_{l_{c_i}}^{a,s} * p(D_{c_i} | l_{c_i})^{\tilde{a},s};$$

49 and the number of fatal incident cases for health outcome  $l_{g_{j(i)}}$  is:

$$50 \quad d_{l_{g_{j(i)}}}^{a,s} = n_{l_{g_{j(i)}}}^{a,s} * p(D_{g_{j(i)}} | l_{g_{j(i)}})^{\tilde{a},s}.$$

51 Now we can combine estimated number of cases in the different health outcomes of the  
 52 outcome tree with disability weight to compute disability-adjusted life years (DALYs). *YLD* for a  
 53 specific health outcome  $l$  is calculated as the product of the duration of the illness  $t$  and the disability  
 54 weight  $w$ . The YLDs for all health outcomes are then added up to get the total YLD:

$$55 \quad YLD = \sum_{s=0}^1 \sum_{a=0}^{a_{\max}} \left( \left\{ n_e^{a,s} * (t_{l_r}^{\tilde{a},s} * w_{l_r}^{\tilde{a},s}) \right\} + \sum_{i=1}^k \left( \left\{ n_{l_{c_i}}^{a,s} * (t_{l_{c_i}}^{\tilde{a},s} * w_{l_{c_i}}^{\tilde{a},s}) \right\} + \sum_{j=1}^m \left\{ n_{l_{g_{j(i)}}}^{a,s} * (t_{l_{g_{j(i)}}}^{\tilde{a},s} * w_{l_{g_{j(i)}}}^{\tilde{a},s}) \right\} \right) \right)$$

56 Similarly, YLL due to a specific disease is calculated by summation of the number of all fatal  
 57 cases ( $d$ ) due to the health outcome ( $l$ ) of that disease, each case multiplied by the remaining  
 58 individual life expectancy ( $e$ ) as at the age of death  $\tilde{a}$ . Thus:

$$59 \quad YLL = \sum_{s=0}^1 \sum_{a=0}^{a_{\max}} \left( d_{l_r}^{a,s} * e_{l_r}^{\tilde{a},s} \sum_{i=1}^k \left( \left\{ d_{l_{c_i}}^{a,s} * e_{l_{c_i}}^{\tilde{a},s} \right\} + \sum_{j=1}^l \left\{ d_{l_{g_{j(i)}}}^{a,s} * e_{l_{g_{j(i)}}}^{\tilde{a},s} \right\} \right) \right)$$

60 Remaining life expectancy ( $e$ ) as at the age of death  $\tilde{a}$  is equal to the remaining life expectancy as at  
 61 the age of infection  $a$ , but corrected for the time span in years between infection and death.

62  $t_l^{\tilde{a},s}$  and  $e_l^{\tilde{a},s}$  have time as a unit, all other quantities are dimensionless numbers.

63 By adding *YLL* and *YLD* we obtain DALYs for an infectious pathogen, including both acute  
 64 illness and associated sequelae. Thus:

$$\begin{aligned}
 65 \text{ DALY} = & \sum_{s=0}^1 \sum_{a_i=0}^{a_{\max}} \left( \left\{ n_e^{a,s} * (t_{l_r}^{\tilde{a},s} * w_{l_r}^{\tilde{a},s}) \right\} + \sum_{i=1}^k \left( \left\{ n_{l_{ci}}^{a,s} * (t_{l_{ci}}^{\tilde{a},s} * w_{l_{ci}}^{\tilde{a},s}) \right\} + \sum_{j=1}^m \left\{ n_{l_{gj(i)}}^{a,s} * (t_{l_{gj(i)}}^{\tilde{a},s} * w_{l_{gj(i)}}^{\tilde{a},s}) \right\} \right) \right) \\
 66 & + \sum_{s=0}^1 \sum_{a=0}^{a_{\max}} \left( d_{l_r}^{a,s} * e_{l_r}^{\tilde{a},s} \sum_{i=1}^k \left( \left\{ d_{l_{ci}}^{a,s} * e_{l_{ci}}^{\tilde{a},s} \right\} + \sum_{j=1}^l \left\{ d_{l_{gj(i)r}}^{a,s} * e_{l_{gj(i)}}^{\tilde{a},s} \right\} \right) \right).
 \end{aligned}$$

67

68 All of the above parameters are age- and sex-dependent. Age at infection is of importance at  
 69 the start of the outcome tree (i.e. root health outcome). For all later stages, it is the age of disease onset  
 70 which determines the severity and the duration of the health outcome itself; and the (conditional)  
 71 probability to die, to recover or to develop a sequela. There may be a functional relationship between  
 72 the age at infection  $a$  and the age of onset of disease  $\tilde{a}$ , for example if disease progression is faster if  
 73 infection is acquired at an older age.

74 For calculating numerical estimates we used point estimates for  $t$  and  $w$ . The (conditional)  
 75 probabilities  $p$  and  $\mu$ , as well as the factor(s)  $\sigma$  (if corrected in one step), or  $\alpha$  and  $\beta$  (if corrected in two  
 76 steps), as well as factor  $\tau$  were sampled from uniform or pert-distributions.

77 **Figure S1 – Outcome tree for an infectious pathogen – an illustration**

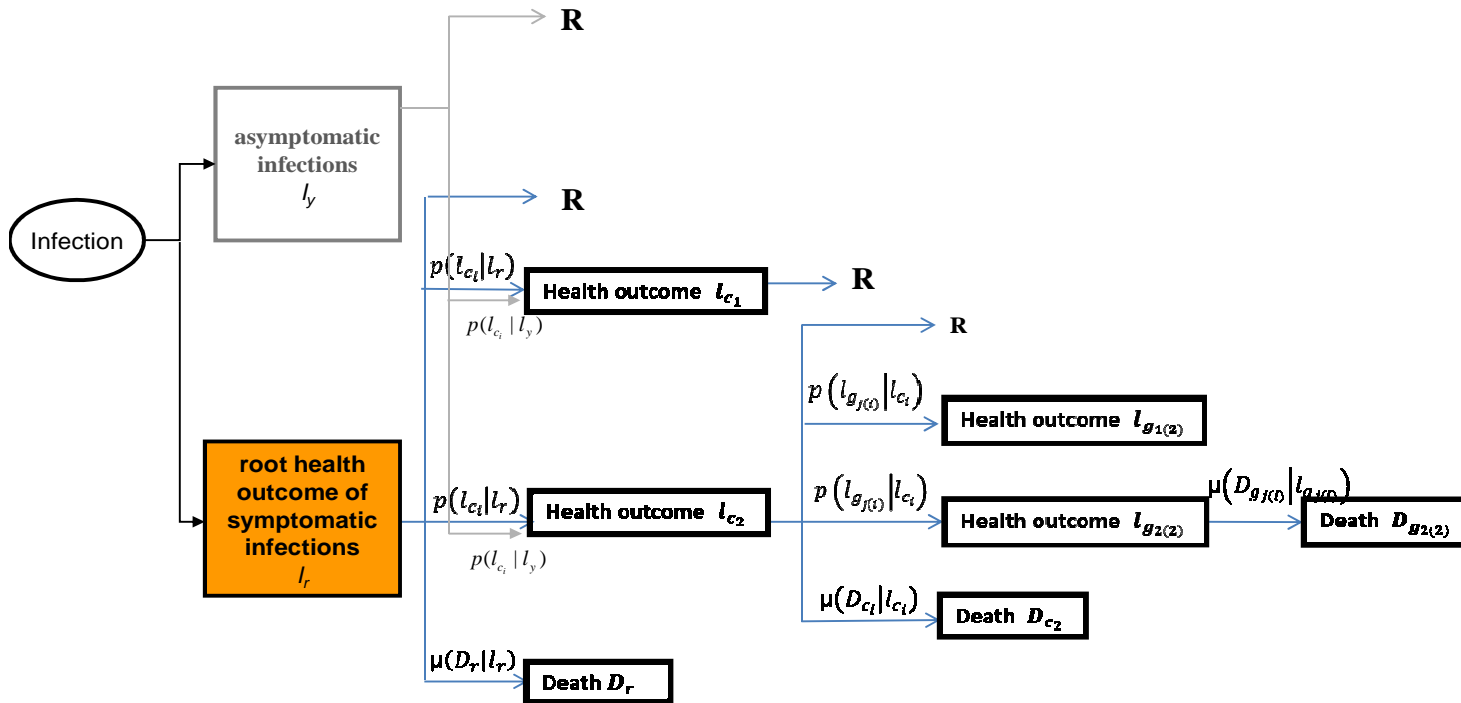

78

79 Note:

- 80 • All the above parameters are age- and sex-dependent. Age at infection is of importance at the start of the outcome tree (i.e. root health outcome). For all later stages,  
81 it is the age of disease onset which determines the severity and the duration of the health outcome; and the (conditional) probability to die, to recover or to develop a  
82 sequela.
- 83 • Two sequences of events following a symptomatic infection are used for illustration. But any number at all of sequences of events may be modelled in the here  
84 presented way.
