# Supplementary material for: The Pathogen- and Incidence-Based DALY Approach: An Appropriated Methodology for Estimating the Burden of Infectious Diseases
Source: PLOS journal article supplement (doi:10.1371/journal.pone.0079740), 2013-11-20
Supplement: S2 (10.1371/journal.pone.0079740.s002) [file journal.pone.0079740.s002]

1 **Supporting Information file 2. – Disease burden of *Salmonella* spp. and *Campylobacter***  
 2 **spp. in the Netherlands using the pathogen- and incidence-based DALY approach**

3

4 **I. Model input summary**

5

6 In the following tables and figures we have summarized the model input parameters for  
 7 estimating the disease burden due to *Salmonella* spp. and associated sequelae, and due to  
 8 *Campylobacter* spp. and associated sequelae in the Netherlands (average 2005-2007).

9 Full details are available on request from the first author.

10

11 **Table S2.1 - Reported laboratory-confirmed cases for *Campylobacter* spp. and**  
 12 ***Salmonella* spp. in the Netherlands (average of the years 2005-2007)**

| Pathogen                  | Reported laboratory-confirmed cases                                                                                                             |                        |
|---------------------------|-------------------------------------------------------------------------------------------------------------------------------------------------|------------------------|
|                           | Male                                                                                                                                            | Female                 |
| <i>Salmonella</i> spp.    | 698.7 <sup>a,b</sup>                                                                                                                            | 728.7 <sup>a,b</sup>   |
| <i>Campylobacter</i> spp. | 1,855.7 <sup>a,b</sup>                                                                                                                          | 1,670.7 <sup>a,b</sup> |
| Source:                   | Laboratory surveillance [1] (personal communication by Wilfrid van Pelt;<br>National Institute of Public Health and the Environment; June 2011) |                        |

13 a) The laboratory surveillance network is composed of public laboratories that do cover in the case of  
 14 *Salmonella* spp. about 64% of the Dutch population, and for *Campylobacter* spp. coverage is 52%.

15 Correction is included in the multiplication factors.

16 b) Cases are stratified by age, into the age-classes: 0; 1-4; 5-9; 10-14; 15-19; 20-24; 25-29; 30-34;  
 17 35-39; 40-44; 45-49; 50-54; 55-59; 60-64; 65-69; 70-74; 75-80; 80-84 and ≥ 85 years.

18

19 **Table S2.2 -Pathogen-specific multiplication factors for the Netherlands**

| Pathogen                  | Multiplication factors (MF) <sup>a, b</sup> | Source |
|---------------------------|---------------------------------------------|--------|
|                           | <i>Most likely (range)</i>                  |        |
| <i>Salmonella</i> spp.    | 19.8 (4.4 - 64.8)                           | [2]    |
| <i>Campylobacter</i> spp. | 18.85 (7.4 – 47.4)                          | [2]    |

20 a) MFs correct for underestimation (under-ascertainment and under-estimation). Additionally, the  
 21 current MFs also take into account that the coverage of the lab-confirmed cases is less than 100%  
 22 (see Table S2.1).

23 b) MFs should by definition be pathogen-, country-, age- and eventually also gender-specific (see  
 24 Supporting Information file 1). But published MFs in the literature fitting Dutch laboratory-  
 25 confirmed *Campylobacter* and *Salmonella* infections were only pathogen- and country-specific  
 26 (for details see Gibbons et al. [3]). In the current illustration, we therefore applied for each  
 27 pathogen separately the same MF to all age- and sex-classes.

28

29 **Figure S2.1 Outcome tree for *Salmonella* spp.**

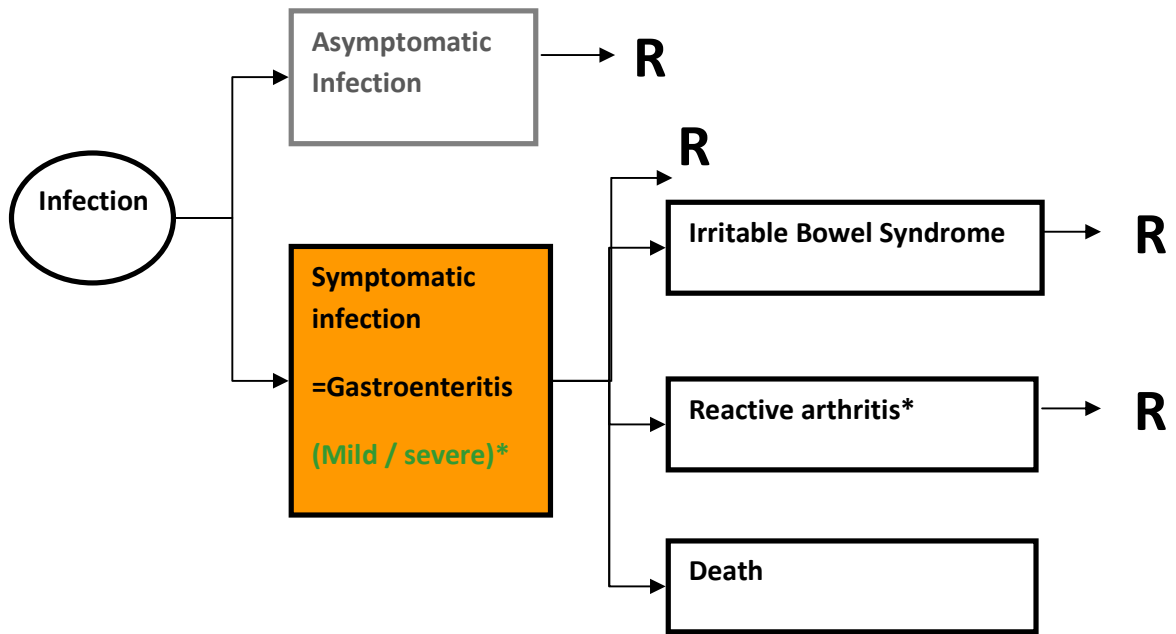

30

31 \*Given the systematic uncertainty, we assumed that only “severe” Salmonella gastroenteritis (GE) cases  
 32 are at risk to develop Reactive arthritis (ReA). This assumption was modified in a scenario analysis where  
 33 we assumed that all Salmonella GE cases are at risk to develop ReA.

**Legend used in the outcome tree:**

|                                                                                     |                                                                                                                                                         |
|-------------------------------------------------------------------------------------|---------------------------------------------------------------------------------------------------------------------------------------------------------|
|  | = Event: Infection with pathogen                                                                                                                        |
|  | = Health outcome <b>without</b> morbidity/mortality (i.e. asymptomatic infection)                                                                       |
|  | = Health outcome resulting in morbidity/mortality                                                                                                       |
|  | = Health outcome resulting in morbidity/mortality; <b>in green and between brackets the different health states of the health outcome</b>               |
|  | = <b>Orange filled box indicates where the model/simulation starts, using estimated annual incidences (e.g. notified cases x multiplication factor)</b> |
| R                                                                                   | = Recovery from health outcome                                                                                                                          |

34

35

36 **Table S2.3 Percentages used in the *Salmonella* spp. outcome tree<sup>a</sup>**

| Health outcome                 | Distribution of health states<br>in health outcome<br><i>Most likely (range)</i> | Risk to develop that<br>health outcome<br><i>Most likely (range)</i> | Sources/ Assumption                                                                                                                                                |
|--------------------------------|----------------------------------------------------------------------------------|----------------------------------------------------------------------|--------------------------------------------------------------------------------------------------------------------------------------------------------------------|
| Gastroenteritis (GE)           | 6.24% (5.35% -7.61%)<br>are severe GE cases                                      | -                                                                    | Laboratory-confirmed cases are a proxy for severe cases. Calculated from simulated incident cases and laboratory-confirmed salmonellosis cases in the Netherlands. |
| Death                          |                                                                                  | 0.1% (0.05%-0.3%) <sup>b</sup>                                       | [4-6]                                                                                                                                                              |
| Irritable Bowel Syndrome (IBS) |                                                                                  | 8.8% (7.2% - 10.4%)                                                  | [7]                                                                                                                                                                |
| Reactive arthritis (ReA)       |                                                                                  | 8% (2.3% - 15.0%) <sup>c</sup>                                       | [5, 8]                                                                                                                                                             |

37 a) See Figure S2.1 for the *Salmonella* spp. outcome tree.

38 b) See Figure S2.3 for the distribution over age-classes

39 c) Only severe GE cases are at risk to develop ReA.

40

41 **Figure S2.2 Outcome tree for *Campylobacter* spp.**

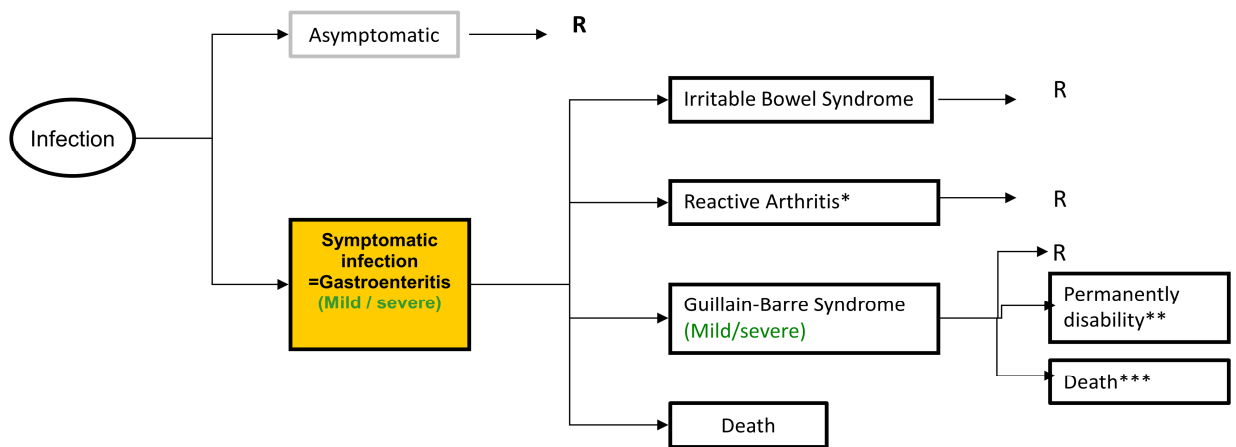

42

43 \* Only severe gastroenteritis (GE) cases are at risk to develop reactive arthritis (ReA). This assumption was  
 44 modified in a scenario analysis where we assumed that all *Campylobacter* GE cases are at risk to develop  
 45 ReA. \*\* Non-fatal severe Guillain-Barré Syndrome (GBS) cases may develop permanent disability; \*\*\*  
 46 The majority of fatal GBS cases are severe GBS cases, for reasons of simplicity we therefore assumed that  
 47 only severe GBS cases may be fatal.

48

**Legend used in the outcome tree:**

|                                                                                                                                           |                                                                                                                                                         |
|-------------------------------------------------------------------------------------------------------------------------------------------|---------------------------------------------------------------------------------------------------------------------------------------------------------|
| <br>Infection                                          | = Event: Infection with pathogen                                                                                                                        |
| <br>Health outcome                                     | = Health outcome <b>without</b> morbidity/mortality (i.e. asymptomatic infection)                                                                       |
| <br>Health outcome                                     | = Health outcome resulting in morbidity/mortality                                                                                                       |
| <br>Health outcome (Health<br>state A; Health state B) | = Health outcome resulting in morbidity/mortality; <b>in green and between brackets the different health states of the health outcome</b>               |
| <br>Health outcome                                     | = <b>Orange filled box indicates where the model/simulation starts, using estimated annual incidences (e.g. notified cases x multiplication factor)</b> |
| R                                                                                                                                         | = Recovery from health outcome                                                                                                                          |

49

50

51 **Table S2.4 Percentages used in the *Campylobacter* spp. outcome tree<sup>a</sup>**

| Health outcome                 | Distribution of health states<br>in health outcome<br><i>Most likely (range)</i> | Risk to develop that<br>health outcome<br><i>Most likely (range)</i> | Sources/ Assumption                                                                                                                                                                  |
|--------------------------------|----------------------------------------------------------------------------------|----------------------------------------------------------------------|--------------------------------------------------------------------------------------------------------------------------------------------------------------------------------------|
| Gastroenteritis (GE)           | 9.6% (4.0% - 22.6%)<br>are severe GE cases                                       | -                                                                    | Laboratory-confirmed cases are a proxy for severe cases. Calculated from simulated number of incident cases [9] and laboratory-confirmed campylobacterosis cases in the Netherlands. |
| Death                          |                                                                                  | 0.03% (0.001% - 0.05%) <sup>b</sup>                                  | [4, 9]                                                                                                                                                                               |
| Irritable Bowel Syndrome (IBS) |                                                                                  | 8.8% (7.2% - 10.4%)                                                  | [7]                                                                                                                                                                                  |
| Reactive arthritis (ReA)       |                                                                                  | 7.9% (2.4% - 8.0%) <sup>c</sup>                                      | [10-12]                                                                                                                                                                              |
| Guillain-Barré Syndrome (GBS)  | 17% are mild GBS cases <sup>d</sup> ;<br>83% are severe GBS cases <sup>d</sup>   | 0.02%-0.09% <sup>d</sup>                                             | [13-16]                                                                                                                                                                              |
| GBS fatal                      |                                                                                  | 4.1% (2.4% - 6.0%) <sup>d,e</sup>                                    | [15-18]                                                                                                                                                                              |
| GBS permanent disability       |                                                                                  | 100% of non-fatal<br>severe GBS cases                                | [15, 16]                                                                                                                                                                             |

52 a) See Figure S2.2 for the *Campylobacter* spp. outcome tree.

53 b) See Figure S2.3 for the distribution over age-classes

54 c) Only severe GE cases are at risk to develop ReA.

55 d) See Figure S2.4 for the distribution over age-classes

56 e) In about 3.4 % (2% -5%) of all GBS cases is the disease fatal [15, 18]. The majority of fatal GBS cases are hereby severe GBS cases. For simplification  
57 reasons we therefore assumed that death due to GBS occurs only in severe cases, resulting in 4.1% (2.4% - 6.0%).

58 **Table S2.5 Disability weights and duration**

| Health outcome (health state)              | Disability weight (w) |                                                                                   | Duration                     |        |
|--------------------------------------------|-----------------------|-----------------------------------------------------------------------------------|------------------------------|--------|
|                                            | w                     | Source                                                                            | in years                     | Source |
| GE (health outcome)                        | 0.105                 | [19]                                                                              | 0.017                        | [5]    |
| IBS                                        | 0.042                 | [20]                                                                              | 5                            | [7]    |
| ReA                                        | 0.059                 | Calculated based on<br>Haagsma <i>et al.</i> [20] and<br>Hannu <i>et al.</i> [10] | 1 <sup>a</sup>               | [20]   |
| GBS (mild cases);<br>clinical phase        | 0.090                 | [21]                                                                              | 1 <sup>a</sup>               | [21]   |
| GBS (severe cases);<br>clinical phase      | 0.280                 | [21]                                                                              | 1 <sup>a</sup>               | [21]   |
| GBS (severe cases)<br>permanent disability | 0.160                 | [21]                                                                              | Remaining Life<br>Expectancy | [21]   |

59 a) Duration based on an annual profile disability weight

60

61 **Figure S2.3 Assumed age-distribution of fatal GE cases (in percentage)**

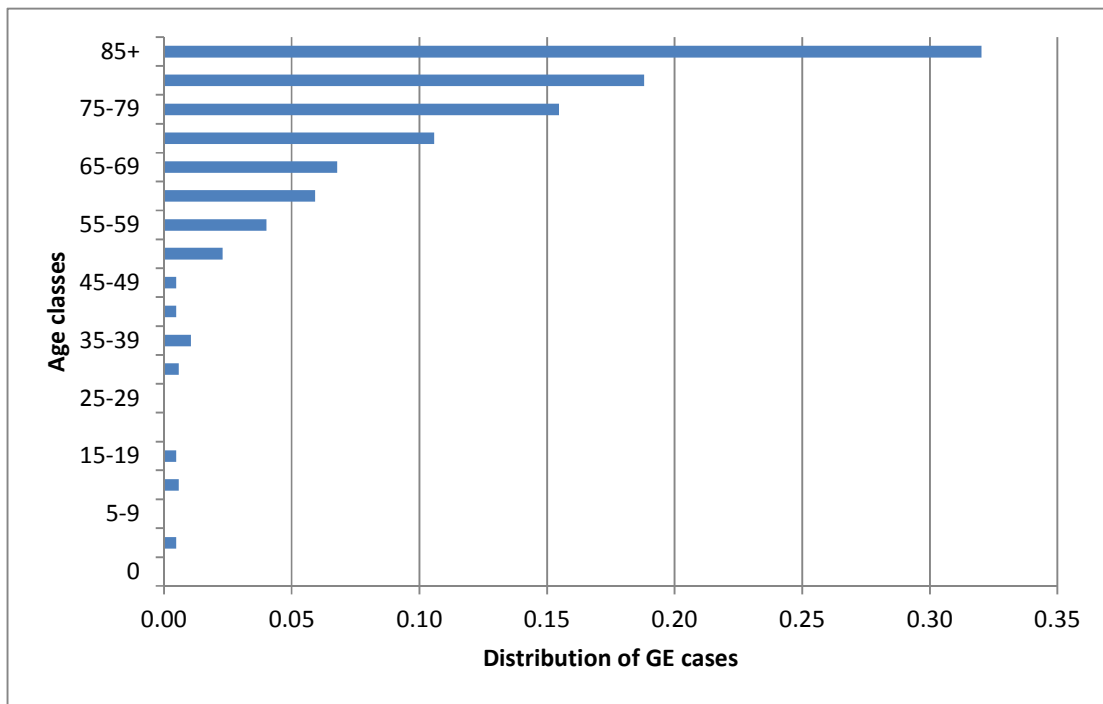

62

63 Source: Based on all reported fatal Salmonellosis cases in Estonia, Germany and the Netherlands for the  
64 years 2005-2007

65



66 **Figure S2.4 Assumed age-distribution of GBS cases (in percentage), as derived from**  
 67 **[15,16].**

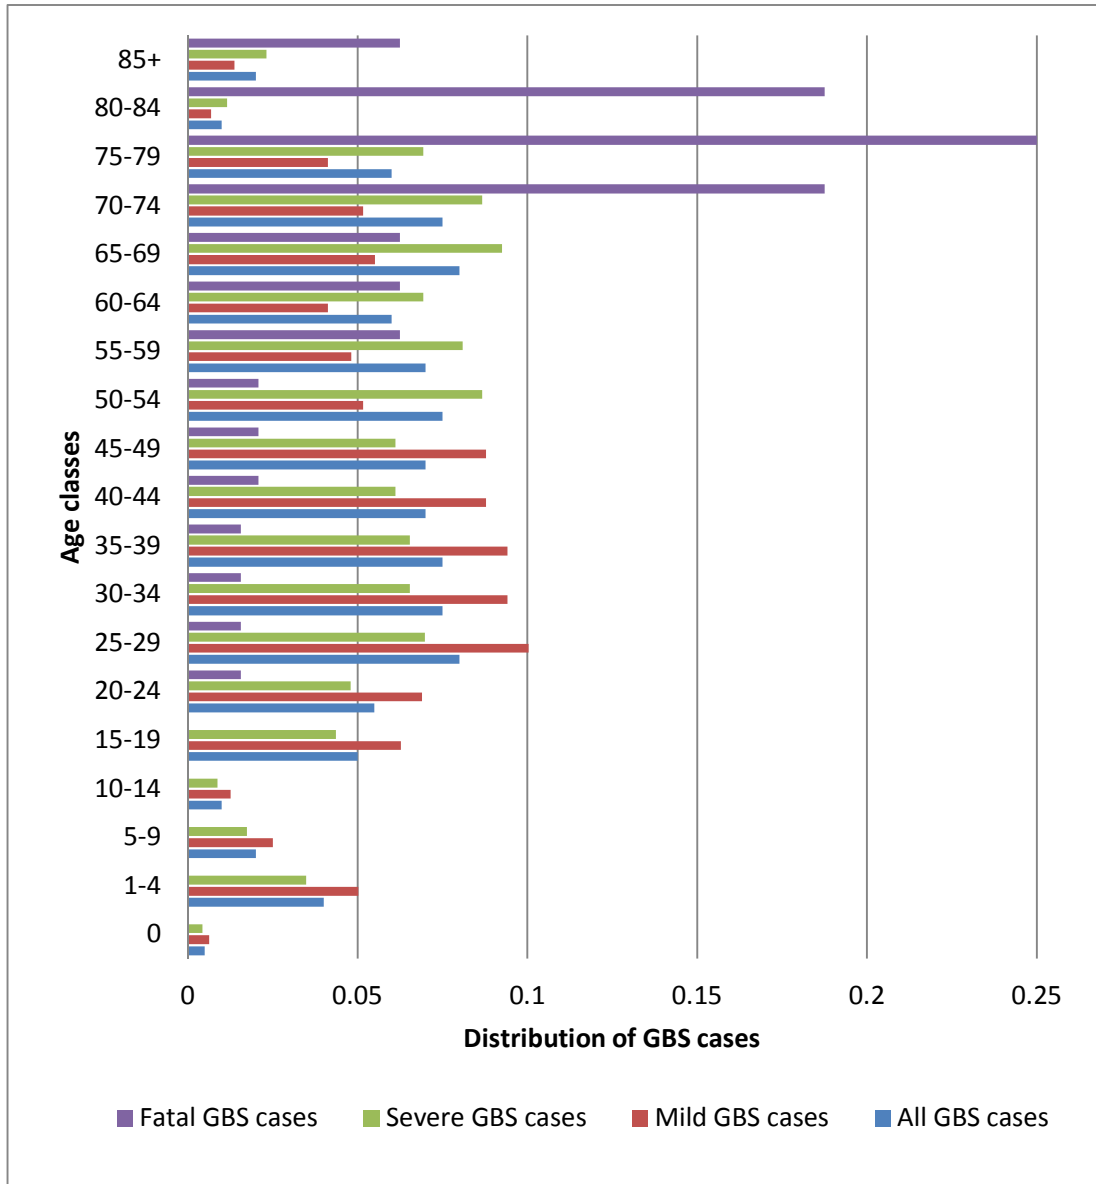

68  
 69 Note: Fatal GBS cases are mostly severe GBS cases. For simplification reason we therefore assumed that  
 70 only severe GBS cases are fatal.

71  
 72  
 73

74 **II. Results**

75

76 In the following tables and figures we have summarized some of the estimated results for  
77 *Salmonella* spp. and associated sequelae, and for *Campylobacter* spp and associated  
78 sequelae in the Netherlands (average 2005-2007). The results show undiscounted DALYs  
79 with uniform age-weights.

80

81 **Table S2.6: The disease burden of *Salmonella* spp and associated sequelae in the Netherlands – Summary results, average and 95%**

82 **CI in brackets and italic.**

| Health outcome(s)          | Cases                  | YLD<br>per year  | YLL<br>per year  | DALY<br>per year   | DALY<br>per case<br><i>Symptomatic</i> | DALY<br>per 100,000 |
|----------------------------|------------------------|------------------|------------------|--------------------|----------------------------------------|---------------------|
| <b>ACUTE ILLNESS</b>       |                        |                  |                  |                    |                                        |                     |
| <b>GE (sum)</b>            |                        | <b>66</b>        | <b>462</b>       | <b>529</b>         | <b>0.015</b>                           | <b>3.2</b>          |
|                            |                        | <i>(55-78)</i>   | <i>(261-728)</i> | <i>(325-798)</i>   | <i>(0.010-0.022)</i>                   | <i>(1.99-4.89)</i>  |
| Cases                      | 35,300                 | 66               |                  | <b>66</b>          |                                        |                     |
|                            | <i>(29,250-41,680)</i> | <i>(55-78)</i>   |                  | <i>(55-78)</i>     |                                        |                     |
| Death                      | 44                     |                  | 462              | <b>462</b>         |                                        |                     |
|                            | <i>(25-70)</i>         |                  | <i>(261-728)</i> | <i>(261-728)</i>   |                                        |                     |
| <b>SEQUELAE</b>            |                        |                  |                  |                    |                                        |                     |
| <b>IBS (sum)</b>           |                        | <b>652</b>       | <b>0</b>         | <b>652</b>         | <b>0.018</b>                           | <b>4.0</b>          |
|                            |                        | <i>(529-790)</i> |                  | <i>(529-790)</i>   | <i>(0.017-0.020)</i>                   | <i>(3.2-4.8)</i>    |
| Cases                      | 3,110                  | 652              |                  | <b>652</b>         |                                        |                     |
|                            | <i>(2,520-3,760)</i>   | <i>(529-790)</i> |                  | <i>(529-790)</i>   |                                        |                     |
| <b>ReA (sum)</b>           |                        | <b>11</b>        | <b>0</b>         | <b>11</b>          | <b>0.0003</b>                          | <b>0.07</b>         |
|                            |                        | <i>(6-16)</i>    |                  | <i>(6-16)</i>      | <i>(0.0002-0.0004)</i>                 | <i>(0.04-0.09)</i>  |
| Cases                      | 183                    | 11               |                  | <b>11</b>          |                                        |                     |
|                            | <i>(107-273)</i>       | <i>(6-16)</i>    |                  | <i>(6-16)</i>      |                                        |                     |
| <b>Sequelae (sum)</b>      |                        | <b>663</b>       | <b>0</b>         | <b>663</b>         | <b>0.019</b>                           | <b>4.1</b>          |
|                            |                        | <i>(538-803)</i> |                  | <i>(538-803)</i>   | <i>(0.017-0.021)</i>                   | <i>(3.3-4.9)</i>    |
| <b>ALL health outcomes</b> |                        | <b>730</b>       | <b>462</b>       | <b>1,192</b>       | <b>0.034</b>                           | <b>7.3</b>          |
|                            |                        | <i>(594-879)</i> | <i>(261-728)</i> | <i>(913-1,530)</i> | <i>(0.028-0.041)</i>                   | <i>(5.6-9.4)</i>    |

83 Note: Total infected cases are not reported as asymptomatic salmonella cases were not explicitly modelled. Reason for not considering asymptomatic infections was that  
84 they do not contribute to the disease burden.

85

86 **Figure S2.5 The average disease burden (DALY) of *Salmonella* spp. and associated sequelae in the Netherlands per age-group and**  
 87 **gender. The 95% uncertainty range is shown using error bars.**

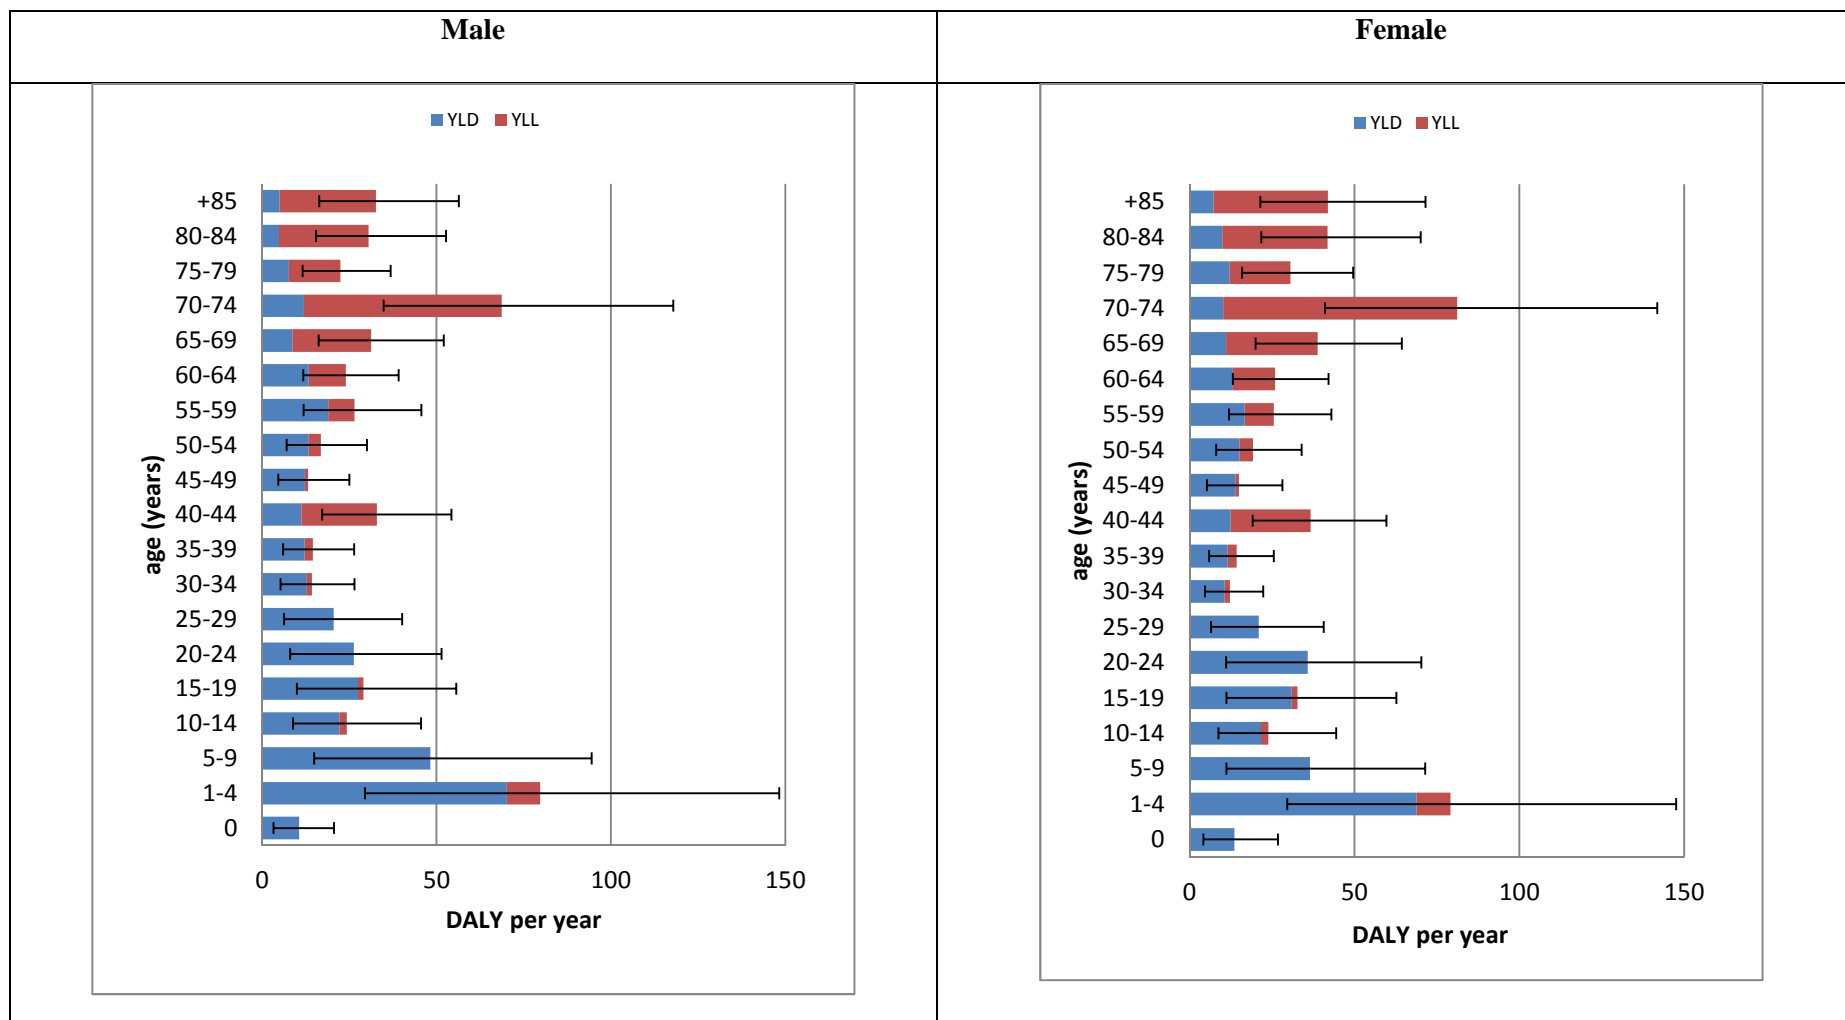

89 **Table S2.7: The disease burden of *Campylobacter* spp. and associated sequelae in the Netherlands – Summary results, average and 95%**

90 **CI in brackets and italic**

| Health outcome(s)    | Cases                  | YLD<br>per year      | YLL<br>per year  | DALY<br>per year     | DALY<br>per case<br><i>Symptomatic</i> | DALY<br>per 100,000 |
|----------------------|------------------------|----------------------|------------------|----------------------|----------------------------------------|---------------------|
| <b>ACUTE ILLNESS</b> |                        |                      |                  |                      |                                        |                     |
| <b>GE (sum)</b>      |                        | <b>144</b>           | <b>227</b>       | <b>371</b>           | <b>0.005</b>                           | <b>2.3</b>          |
|                      |                        | <i>(127-160)</i>     | <i>(122-328)</i> | <i>(262-479)</i>     | <i>(0.003-0.006)</i>                   | <i>(1.6-2.9)</i>    |
| Cases                | 76,500                 | 144                  |                  | <b>144</b>           |                                        |                     |
|                      | <i>(67,800-85,550)</i> | <i>(127-160)</i>     |                  | <i>(127-160)</i>     |                                        |                     |
| Death                | 22                     |                      | 227              | <b>227</b>           |                                        |                     |
|                      | <i>(12-31)</i>         |                      | <i>(122-328)</i> | <i>(122-328)</i>     |                                        |                     |
| <b>SEQUELAE</b>      |                        |                      |                  |                      |                                        |                     |
| <b>IBS (sum)</b>     |                        | <b>1,414</b>         | <b>0</b>         | <b>1,414</b>         | <b>0.018</b>                           | <b>8,7</b>          |
|                      |                        | <i>(1,214-1,635)</i> |                  | <i>(1,214-1,635)</i> | <i>(0.017-0.020)</i>                   | <i>(7.4-10.0)</i>   |
| Cases                | 6,700                  | 1,414                |                  | <b>1,414</b>         |                                        |                     |

|                            |               |               |            |               |                 |             |
|----------------------------|---------------|---------------|------------|---------------|-----------------|-------------|
|                            | (5,800-7,800) | (1,214-1,635) |            | (1,214-1,635) |                 |             |
| <b>ReA (sum)</b>           |               | <b>34</b>     | <b>0</b>   | <b>34</b>     | <b>0.0004</b>   | <b>0.2</b>  |
|                            |               | (20-52)       |            | (20-52)       | (0.0003-0.0007) | (0.1-0.3)   |
| Cases                      | 581           | 34            |            | <b>34</b>     |                 |             |
|                            | (335-889)     | (20-52)       |            | (20-52)       |                 |             |
| <b>GBS (sum)</b>           |               | <b>191</b>    | <b>50</b>  | <b>242</b>    | <b>0.003</b>    | <b>1.5</b>  |
|                            |               | (76-314)      | (18-91)    | (94-398)      | (0.001-0.005)   | (0.6-2.4)   |
| Cases                      | 42            | 191           |            | <b>191</b>    |                 |             |
|                            | (18-67)       | (76-314)      |            | (76-314)      |                 |             |
| Death                      | 1.4           |               | 50         | <b>50</b>     |                 |             |
|                            | (0.5-2.6)     |               | (18-91)    | (18-91)       |                 |             |
| <b>Sequelae (sum)</b>      |               | <b>1,640</b>  | <b>50</b>  | <b>1,690</b>  | <b>0.022</b>    | <b>10.3</b> |
|                            |               | (1,379-1,920) | (18-91)    | (1,406-1,994) | (0.019-0.025)   | (8.6-12.2)  |
|                            |               | <b>1,783</b>  | <b>277</b> | <b>2,061</b>  | <b>0.027</b>    | <b>12.6</b> |
| <b>ALL Health Outcomes</b> |               | (1,512-2,075) | (165-387)  | (1,737-2,406) | (0.024-0.030)   | (10.6-14.7) |

91 Note: Total infected cases are not reported as asymptomatic campylobacteria cases were not explicitly modelled. Reason for not considering asymptomatic infections was that  
92 they do not contribute to the disease burden.

93 **Figure S2.6 The average disease burden (DALY) of *Campylobacter* spp. in the Netherlands per age-group and gender. The**  
 94 **95% uncertainty range is shown using error bars.**

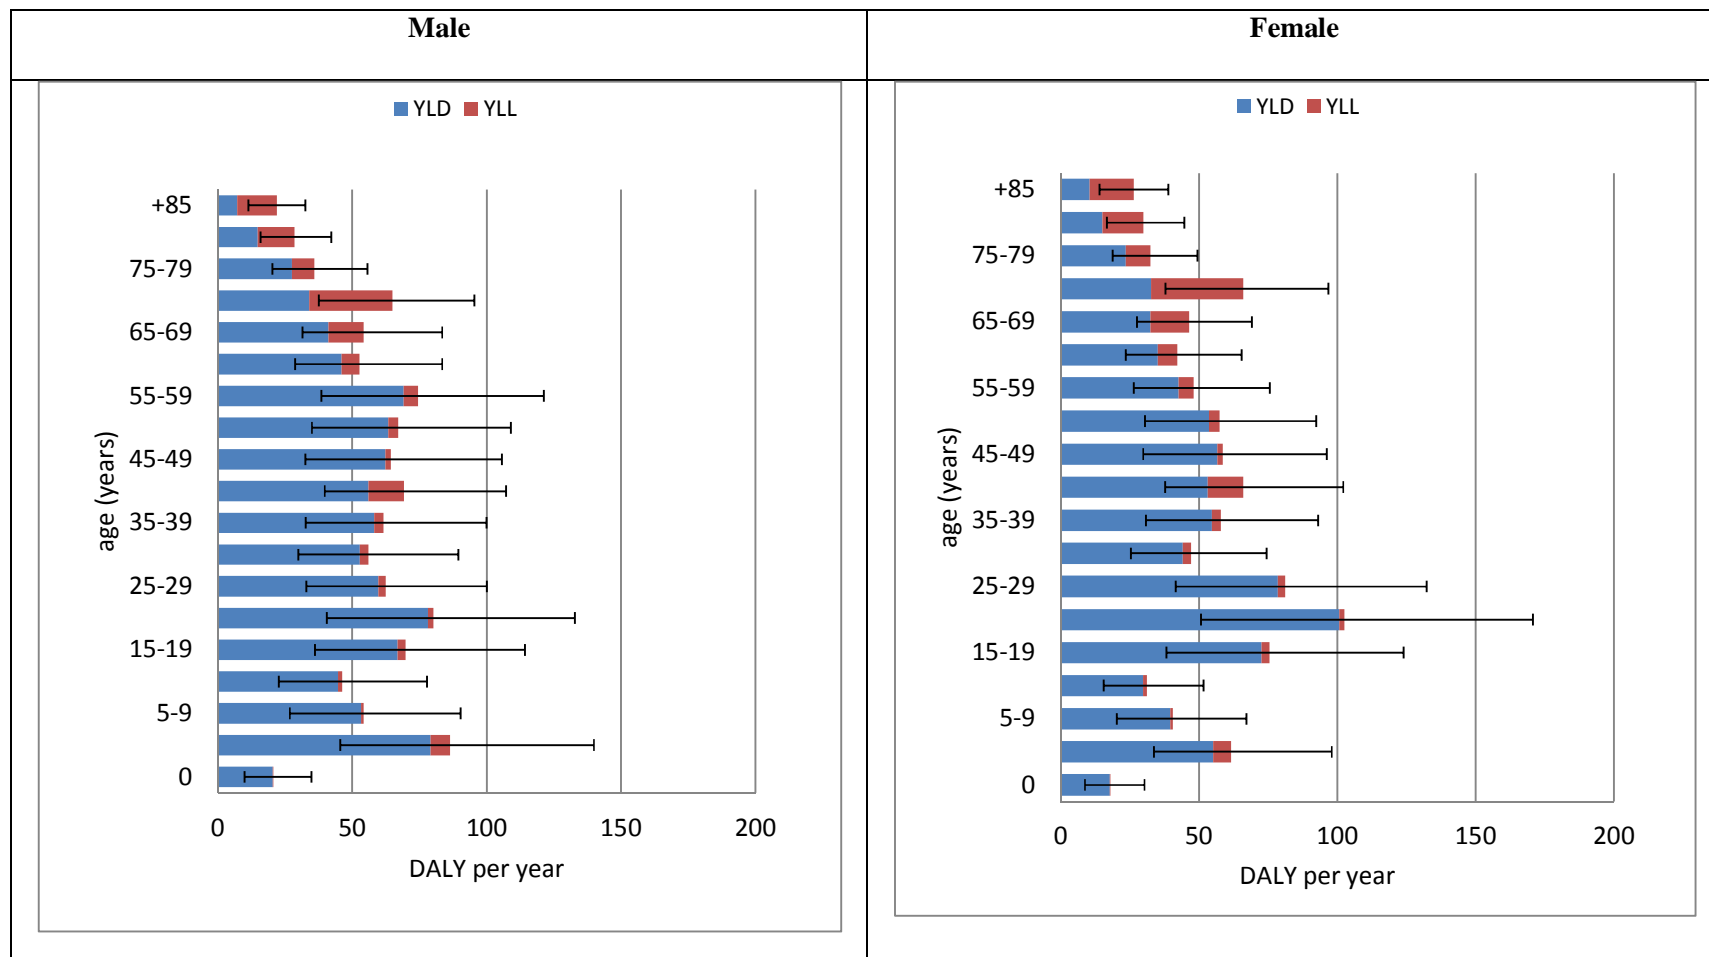

95 **Figure S2.7 - The distribution of undiscounted average burden of Salmonella-associated sequelae and Campylobacter-**  
96 **associated sequelae, respectively, over the associated sequelae.**

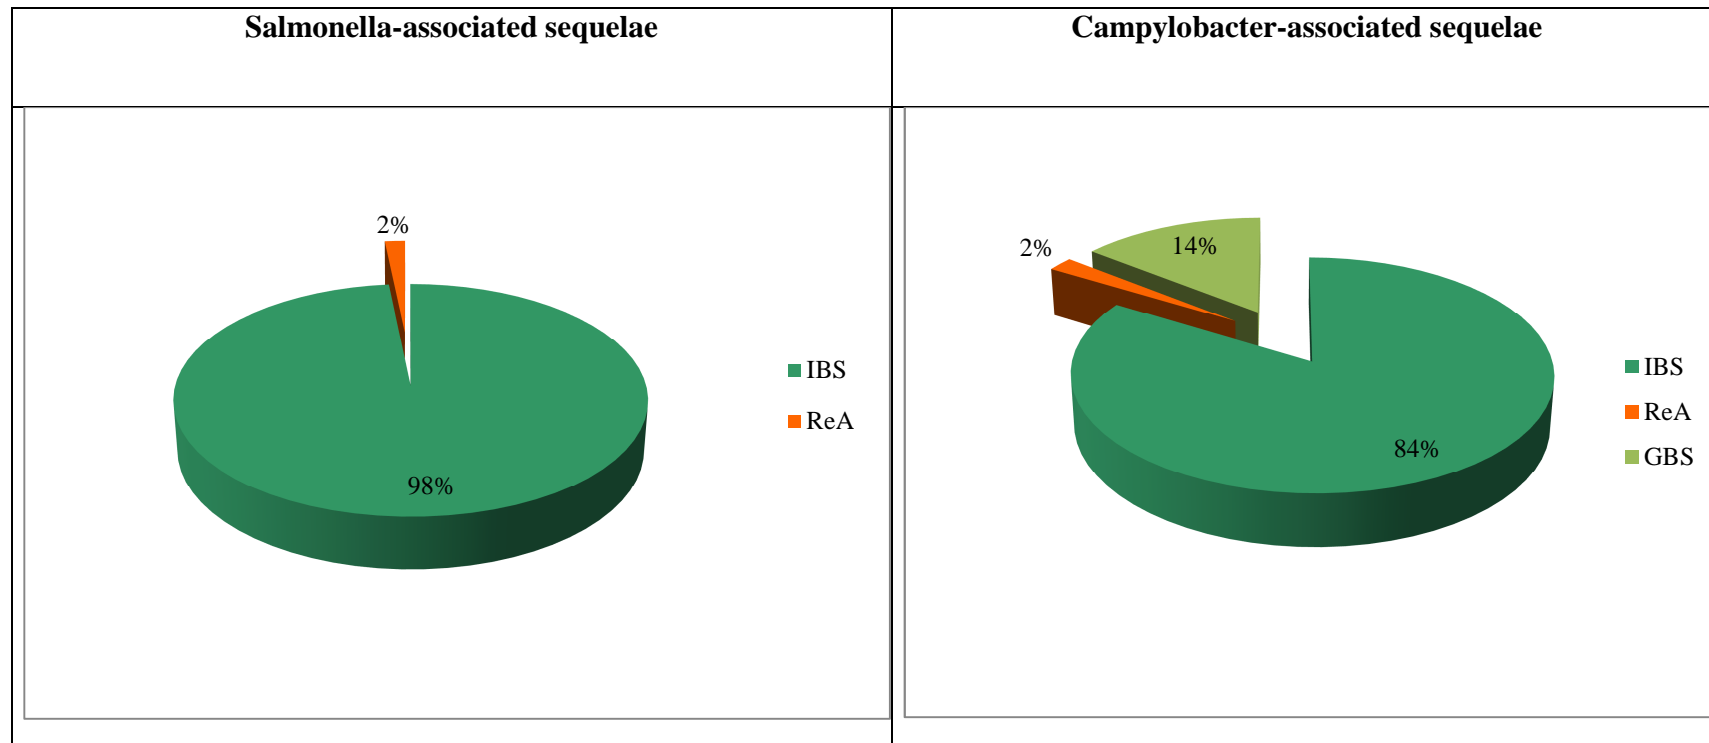



97 **References**

98

- 99 [1] van Pelt W, de Wit MA, Wannet WJ, Ligtoet EJ, Widdowson MA, van  
100 Duynhoven YT. Laboratory surveillance of bacterial gastroenteric pathogens in  
101 The Netherlands, 1991-2001. *Epidemiol Infect* 2003; 130(3):431-41.
- 102 [2] Havelaar AH, Ivarsson S, Löfdahl M, Nauta MJ. Estimating the true incidence of  
103 campylobacteriosis and salmonellosis in the EU. *Epidemiol Infect* 2013; 141 (2):  
104 293-302.
- 105 [3] Gibbons CL, Mangan MJ, Plass D, Havelaar AH, Brooke RJ, Cassini A,  
106 Peterson K, Stuurman A, Fèvre E, Kretzschmar MEE. Estimating the extent of  
107 under-reporting and under-ascertainment of infectious diseases. (In preparation).
- 108 [4] Adak GK, Long SM, O'Brien SJ. Trends in indigenous foodborne disease and  
109 deaths, England and Wales: 1992 to 2000. *Gut* 2002; 51(6):832-41.
- 110 [5] Kemmeren JM, Mangan M-JJ, van Duynhoven YTHP, Havelaar AH. Priority  
111 setting of foodborne pathogens: disease burden and costs of selected enteric  
112 pathogens. Bilthoven: National Institute of Public Health and Environment; 2006.
- 113 [6] Much P, Pichler J, Allerberg F. Food borne infectious outbreaks, Austria 2005.  
114 *Wien Klin Wochenschr* 2007; 119(5-6):150-7.
- 115 [7] Haagsma JA, Siersema PD, De Wit NJ, Havelaar AH. Disease burden of post-  
116 infectious irritable bowel syndrome in the Netherlands. *Epidemiol Infect* 2010;  
117 138(11):1650-6.

- 118 [8] Raybourne RB, Williams KM, Roberts T, and Arthritis Working Group. Food  
119 Poisoning: Economic Implications. In: Caballero B, Trugo L, Finglas P (eds).  
120 Encyclopedia of Food Sciences and Nutrition. London; 2003.
- 121 [9] Mangen MJJ, Havelaar AH, Bernsen RAJAM, Van Koningsveld R, de Wit GA.  
122 The costs of human Campylobacter infections and sequelae in the Netherlands: a  
123 DALY and cost-of-illness approach. Food economics - Acta Agriculturae  
124 Scandinavica, Section C 2005; 2(1):35-51.
- 125 [10] Hannu T, Mattila L, Rautelin H, Pelkonen P, Lahdenne P, Siitonen A, et al.  
126 Campylobacter-triggered reactive arthritis: a population-based study.  
127 Rheumatology 2002; 41(3):312-8.
- 128 [11] Kosunen TU, Kauranen O, Martio J, Pitkanen T, Ponka A, Hortling L, et al.  
129 Reactive arthritis after campylobacter jejuni enteritis in patients with HLA-B27.  
130 Lancet 1980; 1(8181):1312-3.
- 131 [12] Johnsen K, Ostensen M, Melbeye AC, Melby K. HLA-B27-negative arthritis  
132 related to Campylobacter jejuni enteritis in three children and two adults. Acta  
133 Med Scand 1983; 214(2):165-8.
- 134 [13] Allos BM. Association between Campylobacter infection and Guillain-Barré  
135 syndrome. J Infect Dis 1997; 176(Suppl2):S125-S8.
- 136 [14] Ternhag A, Törner A, Svensson A, Ekdahl K, Giesecke J. Short- and long-term  
137 effects of bacterial gastrointestinal infections. Emerg Infect Dis 2008; 14(1):143-  
138 8.

- 139 [15] Havelaar AH, de Wit MAS, van Koningsveld R, van Kempen E. Health burden in  
140 the Netherlands due to infection with thermophilic *Campylobacter* spp. *Epidemiol*  
141 *Infect* 2000; 125(3):505-22.
- 142 [16] Havelaar AH, de Wit MAS, van Koningsveld R. Health burden in the Netherlands  
143 (1990-1995) due to infection with thermophilic *Campylobacter* species.  
144 Bilthoven: National Institute for Public Health and the Environment; 2000.
- 145 [17] Van Koningsveld R, Van Doorn PA, Schmitz PI, Ang CW, Van der Meche FG.  
146 Mild forms of Guillain-Barre syndrome in an epidemiologic survey in The  
147 Netherlands. *Neurology* 2000; 54(3):620-5.
- 148 [18] Van Koningsveld R, Van Doorn PA, Schmitz PI, Van der Meche FG. Changes in  
149 referral pattern and its effect on outcome in patients with Guillain-Barre  
150 syndrome. *Neurology* 2001; 56(4):564-6.
- 151 [19] WHO. Global Burden of Disease 2004 Update: Disability weights for diseases  
152 and conditions. Geneva: WHO; 2004.
- 153 [20] Haagsma JA, Havelaar AH, Janssen BM, Bonsel GJ. Disability Adjusted Life  
154 Years and minimal disease: application of a preference-based relevance criterion  
155 to rank enteric pathogens. *Popul Health Metr* 2008; 6:7.
- 156 [21] Havelaar AH, Haagsma J, Mangan MJJ, Kemmeren JM, Verhoef L, Vijgen SMC,  
157 et al. Disease burden of foodborne pathogens in the Netherlands, 2009. *Int. J Food*  
158 *Microbiol.* 2012; 156(3):231-8.
